# Supplementary material
Source: publisher site journal article supplement (https://www.spandidos-publications.com/1003/downloadSupplementary)
Supplement: Supplementary file 1 [file downloadSupplementary]

Table SI. Primers for reverse transcription-quantitative polymerase chain reaction.

| Gene           | Forward or reverse | Primer sequence (5'3')                                             |
|----------------|--------------------|--------------------------------------------------------------------|
| MALAT1         | Forward            | CTTTGCGGGTGTGTAGGTTT                                               |
|                | Reverse            | GAGGCTTGTGGTAGGTCATCTGTT                                           |
| MALAT1-siRNA-1 | Forward            | CACCGCTGTGGAGTTCTTAAATATCTTC<br>AAGAGAGATATTTAAGAACTCCACAGCTTTTTTG |
|                | Forward            | GATCCAAAAAAGCTGTGGAGTTCTTAAATATCTC<br>TCTTGAAGATATTTAAGAACTCCACAGC |
| Control-siRNA  | Forward            | UUCUCCGAACGUGUCACGUTTACGUGACACGUAUCGGAGAATT                        |
| 18SrRNA        | Forward            | CGGACATCTAAGGGCATCA                                                |
|                | Reverse            | AAGACGGACCAGAGCGAAA                                                |
| miR-129-5p     | Forward            | GATCCGCAAGCCCAGACCGCAAAAAGTTTTTA                                   |
| U6 snRNA       | Forward            | ACGCAAATTCGTGAAGCGTT                                               |
| SOX9           | Forward            | GTGCAAGCTGGCAAAGTTGA                                               |
|                | Reverse            | TGCTCAGTTCACCGATGTCC                                               |

si#1, MALAT1-siRNA-1; si#2, MALAT1-siRNA-2; miR, microRNA; MALAT1, metastasis associated lung adenocarcinoma transcript 1; SOX9, SRY-box 9.
